# Supplementary material for: Development of α-Cyclodextrin-Based Orally Disintegrating Tablets for 4-Phenylbutyrate
Source: MDPI journal article supplement (doi:10.3390/pharmaceutics16010082), 2024-01-07
Supplement: s1 [file s1]

# Development of $\alpha$ -Cyclodextrin-Based Orally Disintegrating Tablets for 4-Phenylbutyrate

Kindness L. Commey <sup>1,2</sup>, Airi Enaka <sup>1</sup>, Ryota Nakamura <sup>1</sup>, Asami Yamamoto <sup>1</sup>,  
Kenji Tsukigawa <sup>1,2</sup>, Koji Nishi <sup>1,2</sup>, Daisuke Iohara <sup>1,2</sup>, Fumitoshi Hirayama <sup>1,2</sup>,  
Masaki Otagiri <sup>1,2,\*</sup> and Keishi Yamasaki <sup>1,2,\*</sup>

<sup>1</sup> Faculty of Pharmaceutical Sciences, Sojo University, 4-22-1 Ikeda, Kumamoto 860-0082, Japan;  
g1971d03@m.sojo-u.ac.jp (K.L.C.); g1851033@m.sojo-u.ac.jp (A.E.); g1951079@m.sojo-u.ac.jp (R.N.); g2051122@m.sojo-u.ac.jp (A.Y.); tsukigawa@ph.sojo-u.ac.jp (K.T.); knishi@ph.sojo-u.ac.jp (K.N.); dio@ph.sojo-u.ac.jp (D.I.); fhira@ph.sojo-u.ac.jp (F.H.)

<sup>2</sup> DDS Research Institute, Sojo University, 4-22-1 Ikeda, Kumamoto 860-0082, Japan

\* Correspondence: otagirim@ph.sojo-u.ac.jp (M.O.); kcyama@ph.sojo-u.ac.jp (K.Y.).

- Test liquid: Ultrapure water
- Elution time:  $\sim 10$  min
- Number of tests:  $N=3$

### [Analysis of water uptake behavior]

The data were analyzed by nonlinear fitting to the following absorption rate equation assuming a pseudo-first order rate using GraphPad PRISM®, version 7 (GraphPad Software, Inc, San Diego, CA, USA).

$$V = V_{\max} [1 - \exp(-k \cdot t)]$$

$V$ : Water uptake at time,  $t$

$k$ : Water uptake rate constant

$V_{\max}$ : Maximum water uptake

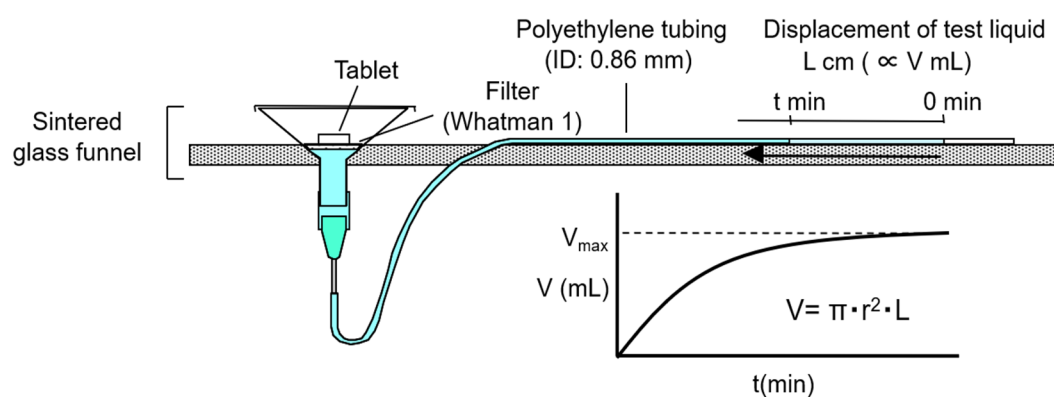

**Figure S1.** Experimental setup and data analysis method for the water uptake behavior of PB-CD ODTs.
